# Supplementary material for: Dynamic Distribution of SeqA Protein across the Chromosome of Escherichia coli K-12
Source: PubMed Central journal article supplement — mBio. 2010 May 18;1(1):e00012-10. doi: 10.1128/mBio.00012-10 (PMC2912659; doi:10.1128/mbio.00012-10), 2010-05-18

**A. *dnaC*: DNA replication**

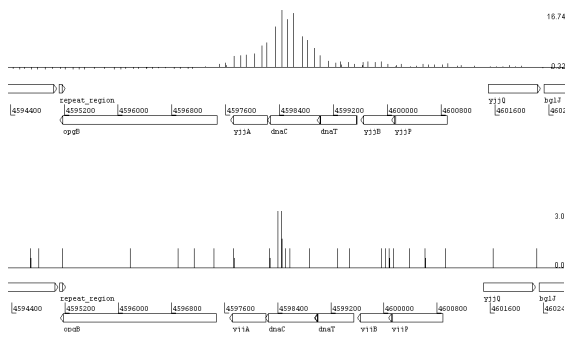

SeqA binding time  
point A

GATC frequency

**B. *ddlA*: Peptidoglycan biosynthesis**

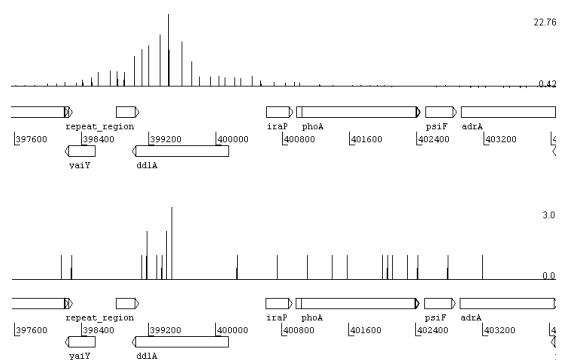

SeqA binding time  
point A

GATC frequency

**C. *prpE*: fatty acid oxidation  
*codB*: cytosine permease**

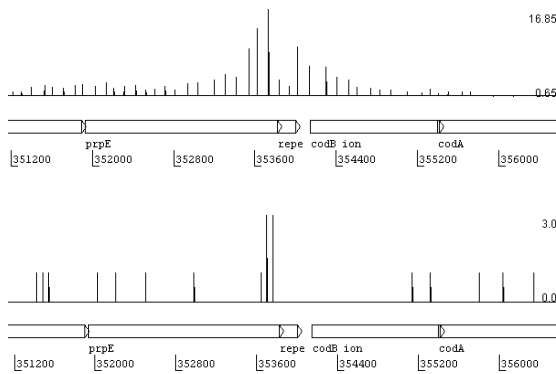

SeqA binding time  
point A

GATC frequency

**D. *ygiQ*: cell outer membrane**

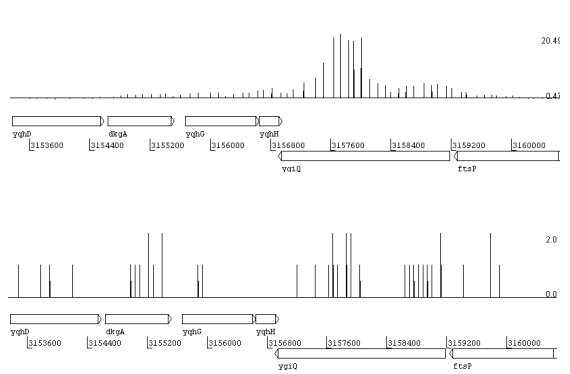

SeqA binding time  
point A

GATC frequency

**E. *pnuC*: nucleotide interconversion  
*aroG*: L-phenylalanine biosynthesis**

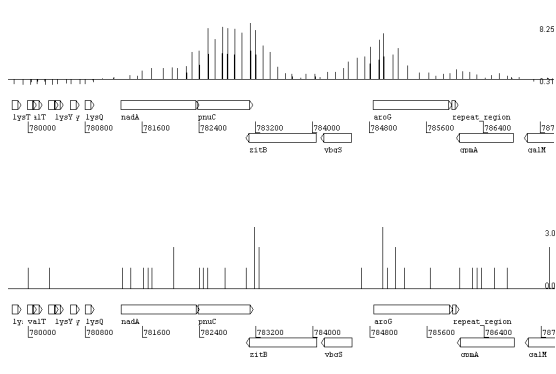

SeqA binding time  
point A

GATC frequency

**F. *ftsW*: cell division**

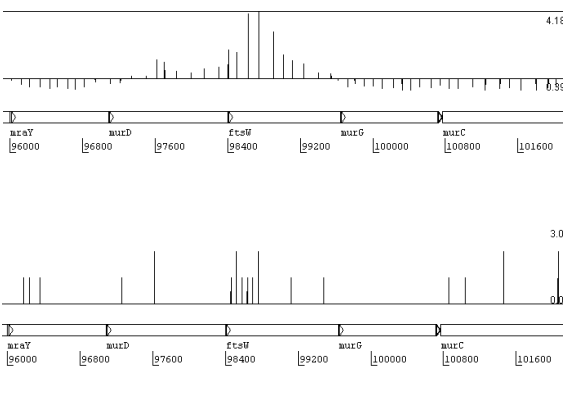

SeqA binding time  
point A

GATC frequency

**G. *nrdA*: nucleotide interconversion**  
*nrdB*: nucleotide interconversion

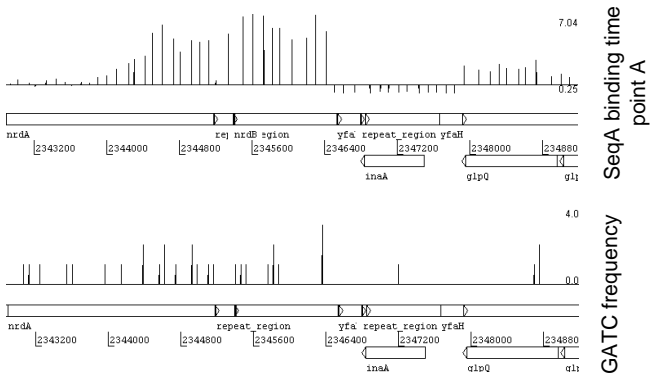

**H. *hisP*: histidine transport**  
*purF*: purine biosynthesis

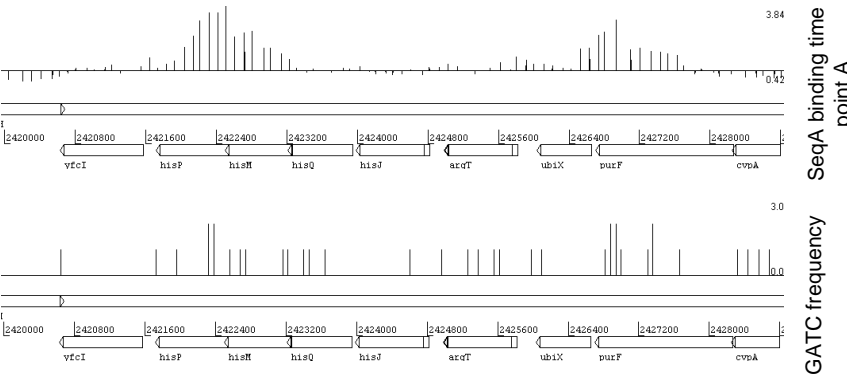

**I. *hyfR*: transcription factor**  
*hda*: DNA replication factor  
*uraA*: nucleotide interconversion

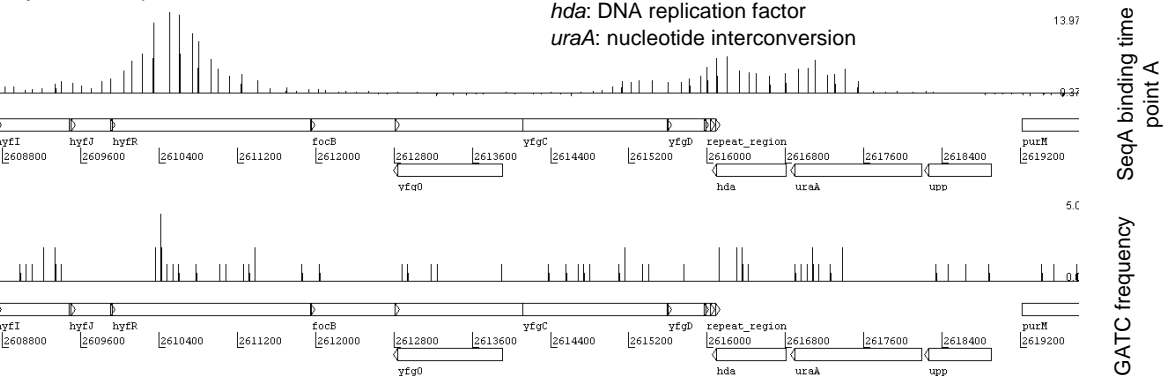

**J. *fryA*: sugar phosphotransferase**

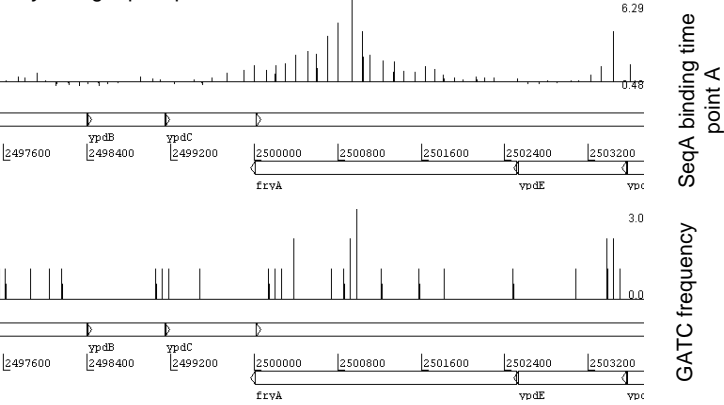

Supplement: mBio12_10FigS2.pdf [file mBio12_10FigS2.pdf]
