# Supplementary figures and images for: Dynamic Distribution of SeqA Protein across the Chromosome of Escherichia coli K-12
Source: PubMed Central journal article supplement — mBio. 2010 May 18;1(1):e00012-10. doi: 10.1128/mBio.00012-10 (PMC2912659; doi:10.1128/mbio.00012-10), 2010-05-18

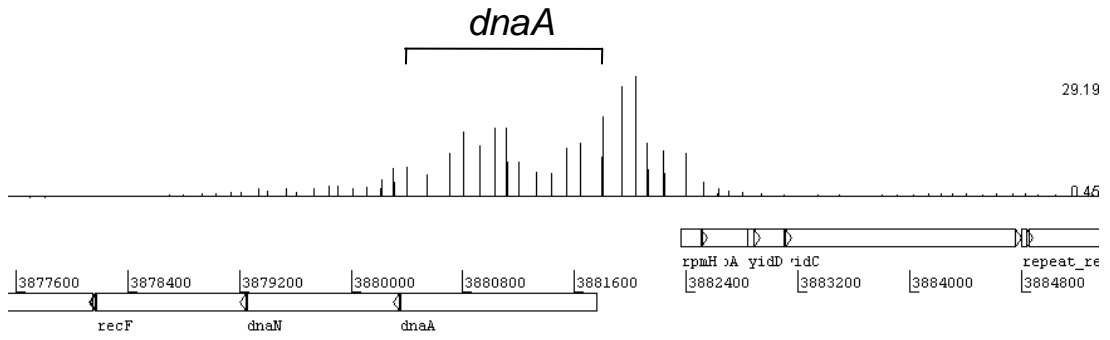

SeqA binding  
time point A

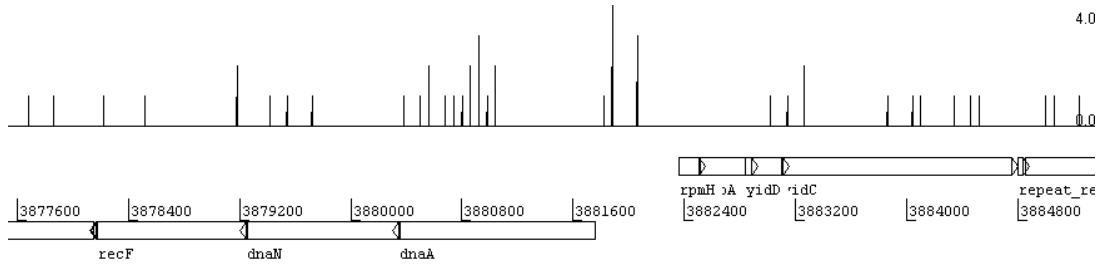

GATC frequency

Supplement: mBio12_10FigS1.pdf [file mBio12_10FigS1.pdf]

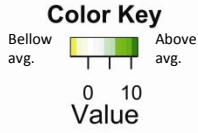

GATC frequency

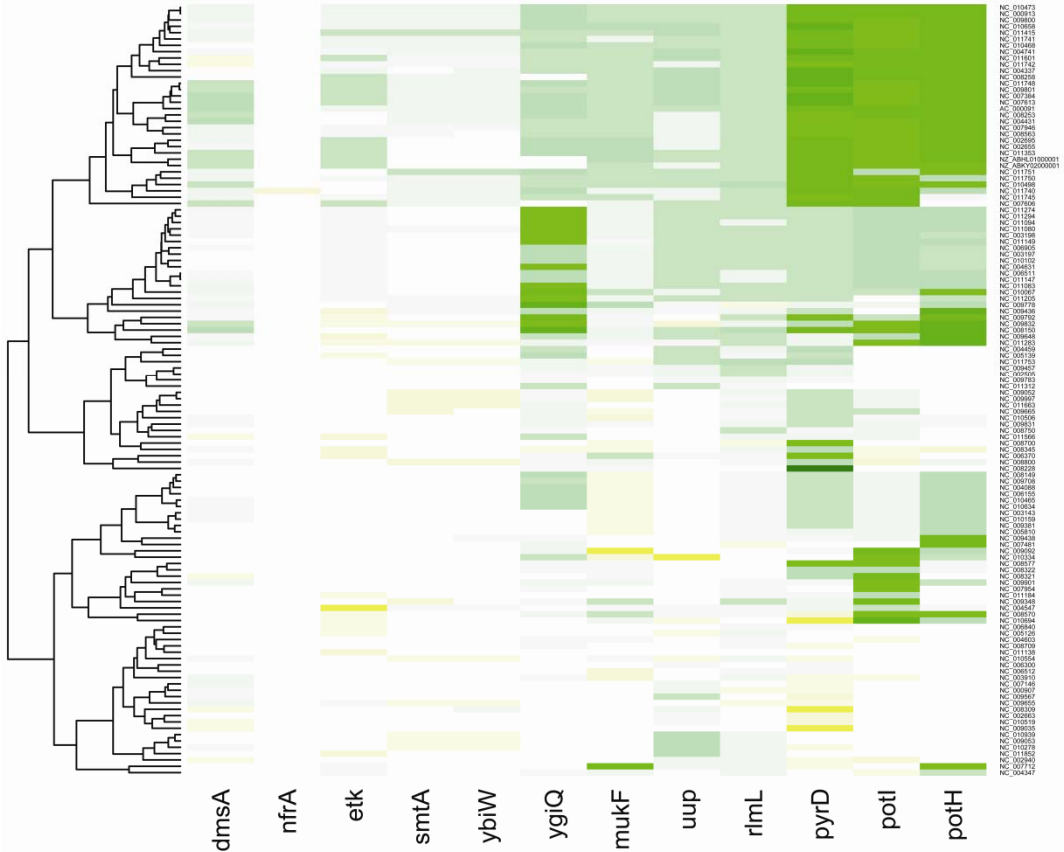

Supplement: mBio12_10FigS3.pdf [file mBio12_10FigS3.pdf]

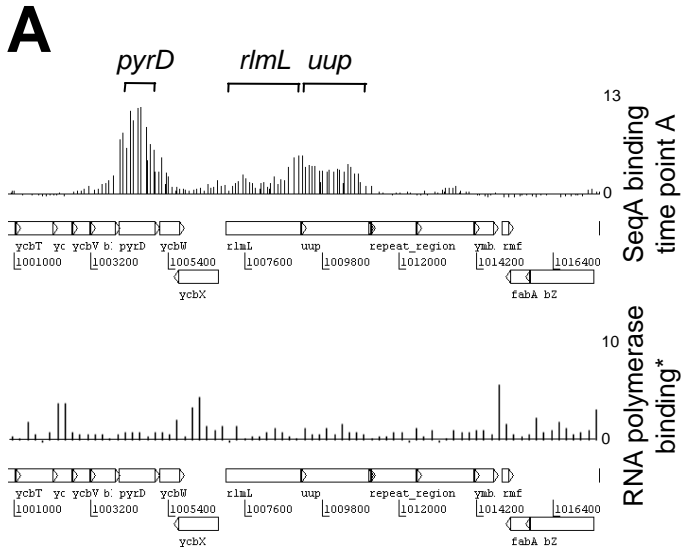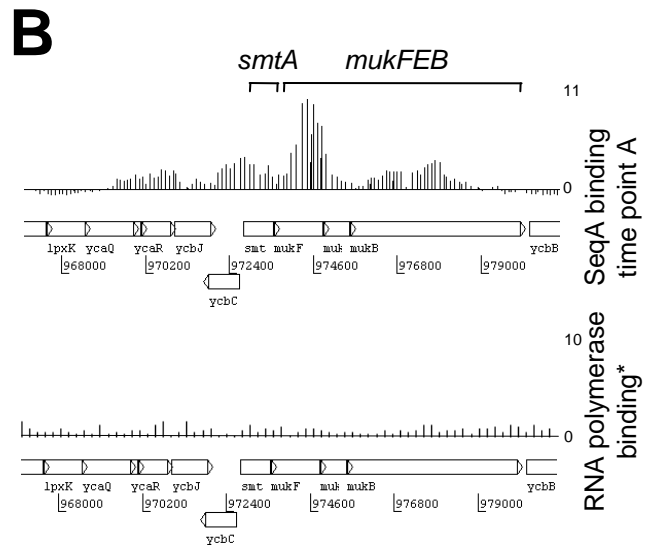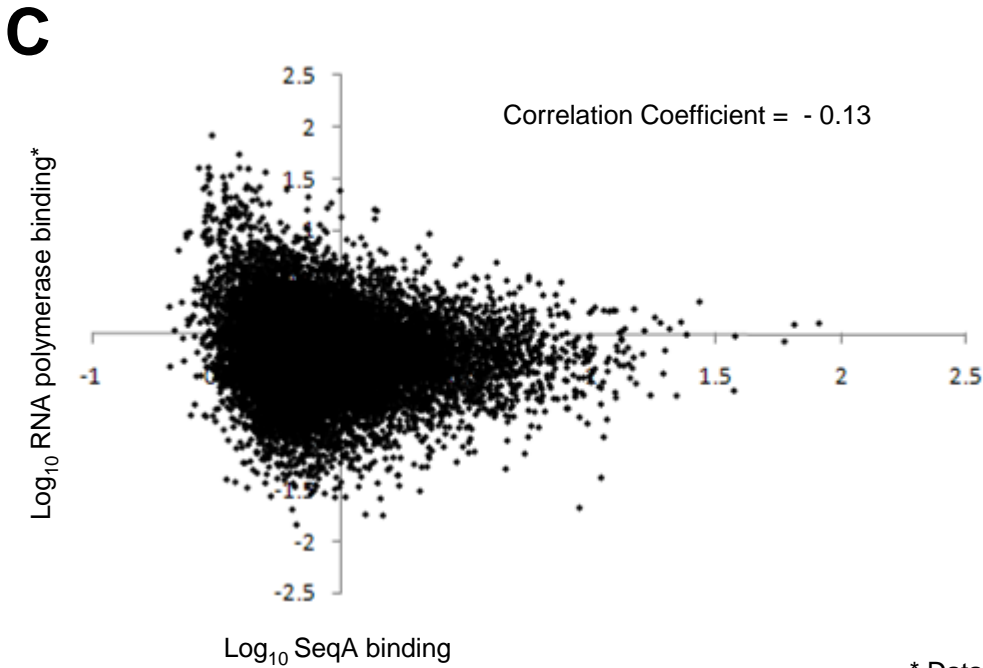

\* Data from Grainger *et al.* 2006

Supplement: mBio12_10FigS4.pdf [file mBio12_10FigS4.pdf]
